# Supplementary material for: Detecting Critical Functional Ingredients Group and Mechanism of Xuebijing Injection in Treating Sepsis
Source: Front Pharmacol. 2021 Dec 6;12:769190. doi: 10.3389/fphar.2021.769190 (PMC8687625; doi:10.3389/fphar.2021.769190)
Supplement: Supplementary file 3 [file Table9.XLSX]

## Sheet: Sheet1
ID	Ingredient name	Targets
COM10	Ethyl ferulate	PTGS1,TLR9,ERN1,MMP9,TUBB3,F3,MMP1,CYP1B1,CYP1A1,DHCR7,IGF2R,MET,PTPN6,CA2,NOD2,MCL1,MMP2,TNFRSF1A,NDUFV2,NDUFV1,NDUFS7,NDUFS6,NDUFS5,NDUFS3,NDUFC2,NDUFB8,NDUFB5,NDUFB4,NDUFB10,NDUFAB1,NDUFA8,NDUFA7,NDUFA13,MT-ND5,MT-ND4L,MT-ND4,MT-ND2,MT-ND1,NDUFS1,NR0B2,NDUFS4,NDUFS2,NDUFB6,NDUFB3,NDUFB1,NDUFA5,NDUFA4,MT-ND3,IMPDH1,DYRK1A,DNM1,CCND3,BACE1,FOS,ODC1,P4HB,HSPD1,TTR,PTPN1,NFE2L2,MAPT,IMPDH2,IKBKG,S…
COM11	Gallic acid	SLC7A11,SELE,GABRB1,ERN1,HIF1AN,SELP,IGFBP3,SELL,CA2,ST3GAL3,LDHB,SLC22A6,POLI,POLH,POLA1,TOP1,TTR,MAPT,SMAD3,TPMT,PGD
COM12	Galuteolin	IL2,TNKS,CYP1B1,FGF2,KCND3,PTPRS,MNAT1,HRAS,TNF,XDH,P4HB,ALDH1B1,ALDH2,TTR,VEGFA,TERT,CREB1,AKR1B1,GLO1,ELAVL1,NMUR2,ADRA2C,CALM1,ADORA1,B4GALT1,ALOX5,ABCC1,ABCG2,ABCB1
COM14	Hyperoside	IL2,CYP1B1,FGF2,KCND3,PTPRS,CA2,HRAS,LGALS3,DYRK1A,MPG,LGALS1,TOP1,XDH,P4HB,ALDH1B1,VEGFA,PKN1,AKR1B1,GLO1,ELAVL1,NMUR2,ADRA2C,ADRA2B,ADRA2A,B4GALT1,ACP1,ALOX5,ABCC1,ABCG2,ABCB1
COM16	Protocatechuic aldehyde	PSMD14,ERN1,MMP9,TUBB3,MMP1,CA2,DNM1,ERCC1,XDH,FOS,HSPD1,TTR,SNCA,NFE2L2,MAPT,AKR1B1,GLO1,ELAVL1,DRD5,ADRB1,DRD1,EGFR,APP,COMT,EP300,NFKB1
COM17	Rosmarinic acid	MMP9,MMP1,MMP3,IGFBP3,MET,YARS,FGR,MCL1,MMP2,NR0B2,PPARG,DNM1,ERCC1,XDH,FOS,PYGM,ODC1,HSPD1,TTR,YES1,SNCA,PTPN2,NFE2L2,MAPT,IKBKG,PCNA,AKR1B1,GLO1,SRC,JUN,FYN,CDC25B,APP,EP300,NFKB1,ABCG2
COM23	Uridine	POLG,PDCD4,PAX8,CDA,LSM6,LGALS3,LGALS1,TOP1,PYGM,PYGB,TK1,MAPT,HSPA8,HSPA5,GAPDH,PYGL,P2RY2,GPR17,ADORA3,PNP,ATIC,ADORA2B,ADORA2A,ADORA1,ADA,RAC1,B4GALT1,CDC42,UMPS
MOL000006	luteolin	IL2,TNKS,KARS,FLT3,ESRRA,MMP9,MMP1,CYP1B1,CYP1A2,CYP1A1,MMP3,KCND3,PTPRS,CA2,CSNK2B,MMP2,PARP1,SYK,MMP12,MPG,XDH,ODC1,P4HB,TTR,VEGFA,TERT,SNCA,PKN1,MAPT,ESR2,CREB1,AKR1B1,GLO1,AR,ELAVL1,NMUR2,CCR4,CALM1,ADORA1,GSK3B,APP,CSNK2A2,ALOX5,ABCC1,ABCG2,ABCB1,ESR1
MOL000008	apigenin	IL2,TNKS,FLT3,ESRRA,CYP3A4,CYP1B1,CYP1A2,CYP1A1,HSD17B3,CYP19A1,KCND3,PTPRS,CDK6,SYK,CDK5R1,CDK4,MPG,XDH,ODC1,P4HB,PTGS2,ALDH2,TTR,CDK1,VEGFA,TERT,PKN1,MAPT,ESR2,CREB1,AKR1B1,GLO1,AR,ELAVL1,NMUR2,CCR4,CALM1,ADORA2A,ACP1,GSK3B,APP,CFTR,CSNK2A1,ABCC1,ABCG2,ABCB1,ESR1
MOL000012	Arachic acid	NOD1,GGPS1,FDPS,HMGCR,GSR,SELP,DAGLA,CYP4F2,EPHX1,PLA2G4A,SMPD2,HSD17B3,TLR2,SPHK1,GSTK1,SELL,THRB,ATG4B,SLC22A6,PPARG,POLL,POLH,PLA2G4C,GSTA1,DNM1,PLA2G2A,PRKCA,TBXA2R,S1PR3,S1PR1,LPAR3,LPAR2,LPAR1,GNAO1,GNAI3,GNAI1,GABBR1,CNR1,ADH1A,PTGDR,PTGIR,FABP4,CDC25C,CDC25B,CDC25A,ACP1
MOL000098	quercetin	IL2,FLT3,ESRRA,MMP9,CYP1B1,CYP1A2,CYP19A1,MMP3,MET,KCND3,PTPRS,CA2,CAMK2B,MMP2,AXL,NEK2,ATP5B,HCK,BACE1,AURKB,MPG,PTK2,XDH,P4HB,TTR,PRSS1,CDK1,VEGFA,TERT,SNCA,PKN1,MAPT,ESR2,CREB1,AKT1,AKR1B1,GLO1,PYGL,ELAVL1,F2,NMUR2,DRD4,CXCR1,CCR4,PIK3CG,IGF1R,AVPR2,TOP2A,PIK3R1,ERBB2,EGFR,ACP1,GSK3B,ATP5C1,ATP5A1,KDR,ABCC2,CSNK2A1,ALOX5,ABCC1,PIM1,APEX1,ABCG2,ABCB1,ESR1
MOL000105	protocatechuic acid	SLC7A11,ERN1,HIF1AN,CYP26B1,IGFBP3,NR4A2,PLEC,KMO,CA2,RXRG,RXRB,RXRA,SLC22A6,POLI,POLH,GSTA1,DNM1,CAMKK2,MPG,ERCC1,TOP1,RARA,HSPD1,TTR,SNCA,RPS6KB2,MAPT,FYN,CDC25B,COMT,TPMT,RHOA,NR4A1,APEX1
MOL000223	caffeic acid	PSMD14,MMP9,TUBB3,F3,MMP1,CYP26B1,CYP1B1,IGFBP3,CA2,MMP2,TNFRSF1A,NR0B2,GSTA1,DNM1,CAMKK2,BACE1,ERCC1,RARA,HSPA1A,XDH,FOS,ODC1,HSPD1,TTR,SNCA,PTPN2,PTPN1,NFE2L2,MAPT,IKBKG,ESR2,AKR1B1,GLO1,PTPN11,GNG2,GNB1,JUN,EGFR,HDAC2,APP,EP300,NFKB1,RHOA,ABCG2,ESR1
MOL000286	β-amyrin acetate	PTGS1,F3,EPAS1,CYP19A1,CYP17A1,PTPN6,CD81,PGR,PIN1,IL1B,PTGS2,PTPN2,PTPN1,MAPT,AR,PLCG1,NR3C1,ACP1
MOL000357	Sitogluside	STAT4,IL2,CYP17A1,FGF2,SREBF2,VDR,STAT2,BCL2,POLA1,BCL2L1,STAT3,G6PD,ESR2,SHBG,AR,STAT1,PTAFR,HTR2A,DRD4,DRD3,DRD2,CNR1,NR1H3,EPHA2,CDC25A,ESR1
MOL000389	FERULIC ACID (CIS)	PTGS1,TLR9,PSMD14,ERN1,MMP9,TUBB3,F3,MMP1,CYP26B1,CYP1B1,CYP1A1,DHCR7,IGFBP3,IGF2R,MET,CSNK1G3,PTPN6,CA2,RXRA,CAMK2G,CAMK2D,CAMK2B,NOD2,MCL1,MMP2,HDAC8,TNFRSF1A,NDUFV2,NDUFV1,NDUFS7,NDUFS6,NDUFS5,NDUFS3,NDUFC2,NDUFB8,NDUFB5,NDUFB4,NDUFB10,NDUFAB1,NDUFA8,NDUFA7,NDUFA13,MT-ND5,MT-ND4L,MT-ND4,MT-ND2,MT-ND1,NDUFS1,NR0B2,NDUFS4,NDUFS2,NDUFB6,NDUFB3,NDUFB1,NDUFA5,NDUFA4,MT-ND3,KCNA3,IMPDH1,DYRK1A,DNM1,…
MOL000476	Physcion	PRTN3,CYP1B1,ELANE,KCND3,MAP2K6,MAP3K7,HCK,TP53,MAPT,LYN,ESR2,CALM1,ACVRL1,LCK,ACLY,CSNK2A1,ABCG2,ESR1
MOL000874	paeonol	TAS1R3,SELE,IL2,PLAU,PLAT,ERN1,TUBB3,CYP1B1,CYP1A2,CYP1A1,SPHK2,CHRND,GUSB,KCND3,ERCC5,CA2,TNFRSF1A,MITF,KLK7,KCNA4,KCNA3,KCNA2,KCNA1,CTBP2,FOS,PHLPP2,NFE2L2,MAPT,GSK3A,ESR2,HSD17B10,GLO1,RELA,STAT1,MTNR1B,MTNR1A,CALM1,PDK1,JUN,GSK3B,APP,COMT,TPMT,NFKB1,ALOX5,HSP90AA1,ABCG2
MOL001399	TWT	GGPS1,FDPS,DNM3,EPHX1,HSD17B3,TLR2,SPHK1,GRIN1,ATG4B,GBA,SLC22A6,DNM2,DNM1,RAD52,PRSS3,PRSS2,PRSS1,GRIN2B,GRIN2A,LPAR3,LPAR2,GNAO1,GNAI3,GNAI1,ADH1A,CDC25B,CDC25A,PRKACA
MOL001494	Mandenol	PTGS1,NOD1,HMGCR,SELP,DAGLA,EPHX1,PLA2G4A,HSD17B3,TLR2,PIN4,PDCD4,SPHK2,SPHK1,PAFAH1B2,PLCG2,TNF,PPARG,POLL,POLH,PLA2G4C,DNM1,PTGS2,LTA4H,PLA2G2A,KAT5,VEGFA,PRKCE,PRKCA,LPAR5,LPAR3,LPAR2,LPAR1,GNAO1,GNAI3,GNAI1,CNR1,TOP2A,ABCC2,ALOX5,APEX1
MOL001729	Crysophanol	PRTN3,GSR,ELANE,FGB,MCL1,BCL2,TCF4,SIRT5,MPG,BCL2L1,TERT,MAPT,ESR2,PLCG1,ELAVL1,ACLY,SMARCA2,CSNK2A2,CSNK2A1,ESR1
MOL001838	Dipalmitin	NOD1,GGPS1,FDPS,HMGCR,SELP,EPHX1,SMPD2,HSD17B3,TLR2,SPHK1,PRKCH,PLCG2,PRKCB,SLC22A6,PRKCG,POLL,POLH,DNM1,PLA2G2A,VEGFA,PRKCQ,PRKCE,PPM1A,PRKCD,PRKCA,S1PR3,LPAR5,LPAR3,LPAR2,LPAR1,GNAO1,GNAI3,GNAI1,CNR1,CDC25C,CDC25B,ACP1,ABCB11,ABCB1
MOL002008	myricetin	KARS,FLT3,ESRRA,CYP1B1,CYP1A2,CYP19A1,KCND3,PTPRS,SYK,POLI,POLH,BACE1,MPG,CASP7,XDH,P4HB,MYLK,TTR,VEGFA,PKN1,MAPT,CREB1,AKR1B1,GLO1,ELAVL1,SMAD3,NMUR2,CCR4,PIK3CG,IGF1R,TOP2A,INSR,ACP1,APP,ALOX5,ABCC1,APEX1,ABCG2,ABCB1
MOL002140	Perlolyrine	PDE4B,MAPT,ESR2,PDE4D,PDE4A,GRM5,GRM1,CXCR4,ADORA2A,ERBB3,ERBB2,EGFR,SMARCA2,ERBB4,ESR1
MOL002141	PLO	IL2,GABRB2,HMGCR,GABRG2,CYP19A1,CYP17A1,SREBF2,SIGMAR1,GABRA4,POLA1,G6PD,ESR2,SHBG,AR,NR1H3,NR1H2,NR3C1,EPHA2,SHH,ESR1
MOL002677	L-1,2-Dipalmitin	NOD1,SELP,DAGLA,EPHX1,HSD17B3,TLR2,SPHK1,PRKCH,PLCG2,TLR4,PRKCB,PRKCG,POLL,POLH,DNM1,PLA2G2A,VEGFA,PRKCQ,PRKCE,PPM1A,MAPT,PRKCD,PRKCA,PTAFR,LPAR5,LPAR3,LPAR2,LPAR1,CNR1,ACP1,APEX1,ABCB1
MOL002684	gamma-Tocotrienol	LSS,SQLE,POLL,PHLPP1,MAPT,ESR2,PRKCA,OPRM1,OPRD1,DRD3,DRD2,CNR1,KDR,FLT4,FLT1,ESR1
MOL002687	guanosine	HPRT1,MARS,EHMT2,PDCD4,PAX8,HSPA6,NPEPPS,MGMT,CDA,MCL1,TARS,HARS,HSPA1L,MAP3K7,QARS,IMPDH1,IARS,HSPA2,POLA1,TOP1,HSPA1A,XDH,SRM,SMS,AMD1,TK1,SETDB1,IMPDH2,HSPA9,HSPA8,HSPA5,GAPDH,EZH2,DNMT1,PLCG1,P2RY2,GPR17,ADORA3,AHCY,ADH1A,P2RY11,PNP,ATIC,ADORA2B,ADORA2A,ADORA1,ADA,RAC1,PRMT1,TPMT,SUV39H1,CDC42
MOL002695	lignan	PTGS1,MAP2K5,MAP2K2,MAP2K1,TNFRSF1A,TUBA4A,NR0B1,ODC1,PTGS2,TUBB,MAPT,PTAFR,TOP2A,NR3C1,ABCB1
MOL002696	lirioresinol-A	ERN1,CYP1B1,ST3GAL3,NDUFV2,NDUFV1,NDUFS7,NDUFS6,NDUFS5,NDUFS3,NDUFC2,NDUFB8,NDUFB5,NDUFB4,NDUFB10,NDUFAB1,NDUFA8,NDUFA7,NDUFA13,MT-ND5,MT-ND4L,MT-ND4,MT-ND2,MT-ND1,NDUFS1,NR0B1,NDUFS4,NDUFS2,NDUFB6,NDUFB3,NDUFB1,NDUFA5,NDUFA4,MT-ND3,NFE2L2,MAPT,SHBG,PTAFR,OPRM1,TOP2B,NDUFS8,NDUFA9,NDUFA2,NDUFA10,NDUFB9,NDUFAF3,ALOX5,PGD
MOL002706	Phytoene	RABGGTB,GGPS1,LSS,CYP19A1,VDR,SQLE,FNTB,KRAS,RARA,MAPT,ESR2,AR,CDC25B,CDC25A,ESR1
MOL002712	6-Hydroxykaempferol	ESRRA,CYP1B1,CYP1A2,HSD17B3,KCND3,PTPRS,POLI,POLH,MPG,XDH,P4HB,ALDH2,VEGFA,TERT,PKN1,MAPT,ESR2,CREB1,AKR1B1,GLO1,ELAVL1,SMAD3,NMUR2,CALM1,ACP1,ABCC3,ABCC2,ALOX5,ABCC1,ABCG2,ABCB1,ESR1
MOL002714	baicalein	IL2,TNKS,SELP,CYP1B1,CYP1A2,CYP1A1,HSD17B3,CYP19A1,NR4A2,SIGMAR1,KCND3,PTPRS,SELL,TNNI3,SLC9A1,CDK6,TNNT2,POLI,POLH,NLRP3,GSTA1,CDK4,CDK3,MPG,XDH,ODC1,TTR,CDK1,VEGFA,TERT,MAPT,CREB1,AKR1B1,GLO1,AR,ELAVL1,SMAD3,CALM1,CDK2,ACP1,APP,COMT,ALOX5,ABCC1,ABCG2,ABCB1
MOL002759	Glyceryl pps	PTGS1,NOD1,TLR2,PRKCH,SF3B3,PLCG2,PRKCB,PRKCG,POLL,POLH,METAP2,PTGS2,VEGFA,PRKCQ,PRKCE,PPM1A,PRKCD,PRKCA,LPAR5,LPAR3,LPAR2,LPAR1,CNR1
MOL002764	MEGxp0_000365	MMP9,MMP1,GLA,DNM3,SIGMAR1,HDAC9,MMP2,HDAC8,HDAC6,HDAC7,DNM2,DNM1,BACE1,ODC1,MAPT,PYGL,PTAFR,DRD4,DRD3,DRD2,CCR2,PTGDR,ERBB3,ERBB2,EGFR,HDAC5,HDAC2,HDAC1,ERBB4
MOL002771	VIV	CYP4F2,CYP4F12,PPP2CB,PRKCB,GSTA1,XDH,PHLPP1,MAPT,ESR2,AKT1,PRKCA,HTR2A,CNR1,KDR,FLT4,FLT1,ALOX5,ESR1
MOL002883	Ethyl oleate (NF)	NOD1,HMGCR,SELP,DAGLA,EPHX1,HSD17B3,TLR2,PDCD4,SPHK2,SPHK1,PAFAH1B2,PLCG2,PGR,TNF,SLC22A6,PPARG,POLL,POLH,PLA2G4C,DNM1,PLA2G2A,VEGFA,PRKCE,PPM1A,MAPT,PRKCA,LPAR5,LPAR3,LPAR2,LPAR1,GNAO1,GNAI3,GNAI1,CNR1,TOP2A,NR3C1,CDC25B,ACP1,ALOX5,APEX1
MOL004495	tigogenin	IL2,GABRB2,SIGMAR1,GRIN2D,GRIN1,ATP12A,CYP51A1,G6PD,GRIN2B,SHBG,CHRM2,SHH,IHH,DHH,EIF4A1
MOL005043	campest-5-en-3beta-ol	VLDLR,IL2,LDLR,LRP8,HMGCR,CYP24A1,CYP19A1,CYP17A1,SREBF2,VDR,CA2,SREBF1,POLA1,CYP51A1,G6PD,ESR2,SHBG,AR,ATIC,NR1H3,NR1H2,EPHB2,EPHA2,CDC25B,CDC25A,SHH,ABCB11,CD4,ABCG2,ABCB1,ESR1
MOL005368	Methyl tricosanoate	NOD1,GGPS1,FDPS,HMGCR,SELP,DAGLA,EPHX1,SMPD2,HSD17B3,TLR2,SPHK1,IGHG4,PTPRC,THRB,CA2,PLCG2,HSD17B12,GBA,ASAH1,SLC22A6,PPARG,POLL,POLH,PLA2G4C,IARS,DNM1,POLA1,PLA2G2A,VEGFA,PTPN2,PTPN1,MAPT,KAT2B,PRKCA,S1PR3,LPAR5,LPAR3,LPAR2,LPAR1,GNAO1,GNAI3,GNAI1,CNR1,ADH1A,TOP2A,CDC25C,CDC25B,CDC25A,ACP1,APEX1
MOL006452	1,5-Dihydroxy-3-methylanthraquinone	PRTN3,GSR,ELANE,FGB,EIF4H,MCL1,BCL2,TCF4,SIRT5,BCL2L1,MAPT,ESR2,PLCG1,ELAVL1,ACLY,SMARCA2,CSNK2A2,CSNK2A1,ESR1
MOL006992	(2R,3R)-4-methoxyl-distylin	FGFR4,CYP1B1,MET,KCND3,FGFR3,FGFR1,KIT,FGR,ST3GAL3,KLK2,FGFR2,XDH,YES1,VEGFA,ESR2,GLO1,SRC,ELAVL1,FYN,KDR,FLT4,FLT1,ABCC2,ABCC1,ABCG2,ABCB1,ESR1,PGD
MOL006999	stigmast-7-en-3-ol	HMGCR,CYP24A1,CYP17A1,SREBF2,VDR,CA2,ATP12A,CYP51A1,AR,CHRM3,CHRM4,CHRM2,NR1H3,NR1H2,CDC25B,CDC25A,ABCB11,ABCG2,ABCB1
MOL007006	oxypaeoniflorin	IL2,F10,FGF2,SQLE,PRKCB,PRKCG,MAG,LGALS3,LGALS1,P4HB,ALDH1B1,VEGFA,PTPN2,PTPN1,PRKCQ,PRKCD,PRKCA,F2
MOL007022	evofolinB	PTGS1,ERN1,PLA2G4A,DHCR7,IGFBP3,IGF2R,TNFRSF1A,NDUFV2,NDUFV1,NDUFS7,NDUFS6,NDUFS5,NDUFS3,NDUFC2,NDUFB8,NDUFB5,NDUFB4,NDUFB10,NDUFAB1,NDUFA8,NDUFA7,NDUFA13,MT-ND5,MT-ND4L,MT-ND4,MT-ND2,MT-ND1,NDUFS1,NDUFS4,NDUFS2,NDUFB6,NDUFB3,NDUFB1,NDUFA5,NDUFA4,MT-ND3,IARS,DYRK1A,FOS,ODC1,PTGS2,TTR,NFE2L2,MAPT,IKBKG,ESR2,SHBG,GLO1,ELAVL1,GCGR,ADCYAP1R1,JUN,ERBB3,ERBB2,EGFR,FYN,APP,ERBB4,EP300,CAMK2A,NFKB1,NDUFS…
MOL007050	2-(4-hydroxy-3-methoxyphenyl)-5-(3-hydroxypropyl)-7-methoxy-3-benzofurancarboxaldehyde	ERN1,CYP1B1,CYP1A1,CCND3,FOS,PDE4B,RAF1,NFE2L2,MAPT,CHEK1,BRAF,SHBG,GLO1,PDE4D,PDE4A,CNR1,ADORA1,EP300,CAMK2A,NFKB1,ALOX5
MOL007068	Przewaquinone B	F10,SUZ12,PTPN6,MAPK9,RBBP7,RBBP4,TCF4,MAPK8,MAPK11,MAPK10,MAPT,MAPK14,EZH2,ELAVL1,ERBB2,EGFR,EED
MOL007074	salvianolic acid b	PTGS1,MMP9,MMP1,MMP3,MMP2,NDUFV2,NDUFV1,NDUFS7,NDUFS6,NDUFS5,NDUFS3,NDUFC2,NDUFB8,NDUFB5,NDUFB4,NDUFB10,NDUFAB1,NDUFA8,NDUFA7,NDUFA13,MT-ND5,MT-ND4L,MT-ND4,MT-ND2,MT-ND1,NDUFS1,NDUFS4,NDUFS2,NDUFB6,NDUFB3,NDUFB1,NDUFA5,NDUFA4,MT-ND3,MMP12,XDH,PYGM,TTR,AKR1B1,JUN,NDUFS8,NDUFA9,NDUFA2,NDUFA10,NDUFB9,NDUFAF3
MOL007092	dan-shexinkum c	GSR,SUZ12,PTPN6,MAP2K5,MAP2K2,MAP2K1,TCF4,PPARG,DYRK1A,MAPT,HSP90B1,SRC,HSP90AB1,ELAVL1,HSP90AA1
MOL007110	isotanshinoneiib	SUZ12,PTPN6,RBBP7,RBBP4,PIK3CD,PIK3CB,MAPT,EZH2,PIK3CA,OPRM1,OPRD1,ERBB3,ERBB2,EGFR,CDC25B,CDC25A,ERBB4,EED
MOL007111	Isotanshinone II	SUZ12,PTPN6,RXRG,RXRB,RBBP7,RBBP4,PIK3CD,PIK3CB,MAPT,EZH2,PIK3CA,ERBB3,ERBB2,EGFR,CDC25B,CDC25A,KDR,FLT4,FLT1,ERBB4,EED
MOL007116	methylrosmarinate	MMP9,TUBB3,MMP1,MMP3,MET,YARS,FGR,MMP2,NR0B2,MMP12,DNM1,BACE1,ERCC1,XDH,FOS,PYGM,ODC1,HSPD1,TTR,YES1,NFE2L2,MAPT,IKBKG,CSK,AKR1B1,GLO1,SRC,TOP2A,JUN,FYN,APP,EP300,NFKB1,ALOX5,ABCG2
MOL007117	methyltanshinonate	PDF,SUZ12,PTPRC,PTPN6,CACNA1C,RBBP7,RBBP4,MPI,TERT,PIK3CD,PIK3CB,MAPT,EZH2,AKR1B1,PDE4A,PIK3CA,PIK3R1,CDC25B,CDC25A,EED
MOL007130	prolithospermic acid	PTGS1,MMP9,MMP1,CYP1B1,MMP3,MMP2,MMP12,KLK2,XDH,ODC1,PTGS2,VEGFA,AKR1B1,PTGER1,PGD
MOL007132	(2R)-3-(3,4-dihydroxyphenyl)-2-[(Z)-3-(3,4-dihydroxyphenyl)acryloyl]oxy-propionic acid	MMP9,MMP1,MMP3,IGFBP3,MET,YARS,MCL1,MMP2,NR0B2,PPARG,MMP12,DNM1,ERCC1,XDH,FOS,PYGM,ODC1,HSPD1,TTR,YES1,SNCA,PTPN2,NFE2L2,MAPT,IKBKG,PCNA,AKR1B1,GLO1,SRC,JUN,FYN,CDC25B,APP,EP300,NFKB1,ABCG2
MOL007134	danshensu	IGFBP3,YARS,CA2,HRAS,MME,ERCC1,FOS,TTR,SNCA,MAPT,CSK,PCNA,JUN,ERBB2,EGFR,LCK,FYN,EZR
MOL007145	salviolone	CYP26B1,SUZ12,NR4A2,RXRG,RXRB,RXRA,RARA,MAPT,ESR2,NCOA2,IGF1R,INSR,CDC25B,CDC25A,ALOX5,ESR1
MOL007151	Tanshindiol B	MMP9,SUZ12,PTPRC,PTPN6,RBBP7,RBBP4,MPI,TERT,MAPT,EZH2,AKR1B1,HTR2C,HTR2A,CDC25B,CDC25A,EED
MOL007154	tanshinoneiia	CYP26B1,SUZ12,NR4A2,PTPRC,PTPN6,RXRG,RXRB,RXRA,RBBP7,RBBP4,MPI,APAF1,PDE4B,TERT,MAPT,EZH2,AKR1B1,PTPN11,PDE4D,PDE4A,CDC25B,CDC25A,EED
MOL008278	4-chloro-N-[1-methyl-5-[[1-methyl-5-[[1-methyl-5-(2-morpholinoethylcarbamoyl)pyrrol-3-yl]carbamoyl]pyrrol-3-yl]carbamoyl]pyrrol-3-yl]-5-[2-(2-pyridyl)ethylamino]isothiazole-3-carboxamide	ERN1,POLR1A,PLD2,RALB,RALA,ITGAV,NRAS,HRAS,TBK1,KRAS,AURKB,AURKA,ERCC1,TOP1,MAPT,ITGB3,HPGDS,HTR2A,GRM4,CCR4,TNIK,NR3C1,INSR,CCNA1,KDR
